## CORRESPONDENCE

Anesthesiology  
1999; 91:1557  
© 1999 American Society of Anesthesiologists, Inc.  
Lippincott Williams & Wilkins, Inc.

*In Reply:*—Although industry and the Food and Drug Administration itself commonly use the words *label* and *off-label*<sup>1</sup> when referring to the package insert, Dr. Moore is correct in stating that Federal Regulations define the label as wording appearing on a carton, bottle, syringe, or ampule.

**Laurence Landow, M.D.**  
Department of Anesthesiology  
Brigham & Women's Hospital

Boston, Massachusetts 02115  
landow@zeus.bwh.harvard.edu

## Reference

1. FDA proposes rules for dissemination information on off-label uses. HHS News, June 5, 1998

(Accepted for publication June 22, 1999.)

Anesthesiology  
1999; 91:1557  
© 1999 American Society of Anesthesiologists, Inc.  
Lippincott Williams & Wilkins, Inc.

## Use of the Endotrol Endotracheal Tube and a Light Wand for Blind Nasotracheal Intubation

*To the Editor:*—I read with interest the report by Iseki *et al.*,<sup>1</sup> who attached a string to the tip of a lighted wand (Trachlight; Laerdal Medical, Armonk, NY) and inserted this modified wand into an endotracheal tube to maneuver the tip of the tube during blind nasotracheal intubation. I suggest that an alternative method is to use the Trachlight and Endotrol tube (Mallinckrodt, Athlone, Ireland). After the inner metal stylet has been removed from the Trachlight, the wand is inserted into the Endotrol tube until the tip of the wand reaches the tip of the tube. The Endotrol tube has a wire hook with which the curve of the tube can be controlled. Therefore, a similar effect can be obtained without modifying any product.

Anesthesiology  
1999; 91:1557  
© 1999 American Society of Anesthesiologists, Inc.  
Lippincott Williams & Wilkins, Inc.

*In Reply:*—We thank Dr. Asai for his interest in our report. It does appear that the use of the Endotrol tube with the Trachlight accomplishes the same result as the modification we described. However, because our approach can be used with many different types of endotracheal tubes, it may be more generally applicable.

**Ken Iseki, M.D.**  
**Masahiro Murakawa, M.D.**

**Takashi Asai, M.D., Ph.D.**  
Research Associate  
Department of Anesthesiology  
Kansai Medical University  
Osaka, Japan  
asait@takii.kmu.ac.jp

## Reference

1. Iseki K, Murakawa M, Tase C, Otsuki M: Use of a modified lightwand for nasal intubation (letter). ANESTHESIOLOGY 1999; 90:635

(Accepted for publication July 8, 1999.)

Department of Anesthesiology  
Fukushima Medical University School of Medicine  
Fukushima 960-1295, Japan  
ken@cc.fmu.ac.jp

(Accepted for publication July 8, 1999.)
